# Supplementary material
Source: PubMed Central journal article supplement (PMC6645112)
Supplement: ao8b02068_si_001.pdf [file ao8b02068_si_001.pdf]

## Structural Analysis of the Complexation of Uranyl, Neptunyl, Plutonyl, and Americyl with Cyclic Imide Dioximes

Deborah A. Penchoff,<sup>†\*\*</sup> Charles C. Peterson,<sup>§</sup> Jon P. Camden,<sup>††</sup> James A. Bradshaw,<sup>††</sup> John D. Auxier II,<sup>§§ †††</sup> George K. Schweitzer,<sup>†††</sup> David M. Jenkins,<sup>†††</sup> Robert J. Harrison,<sup>§§§ †††† \*</sup> Howard L. Hall<sup>† †† §§ \*</sup>

<sup>†</sup>Institute for Nuclear Security, University of Tennessee, 1640 Cumberland Avenue, Tennessee 37996, USA

<sup>‡</sup>Joint Institute for Computational Sciences, Oak Ridge National Laboratory, 1 Bethel Valley Rd., Bldg. 5100, Oak Ridge, Tennessee 37831, USA

<sup>§</sup>University Information Technology, University of North Texas, 225 S. Avenue B, Denton, Texas 76201, USA

<sup>††</sup>Department of Chemistry and Biochemistry, University of Notre Dame, 251 Nieuwland Science Hall, Notre Dame, Indiana, 46556, USA

<sup>††</sup> Y-12 National Security Complex, 602 Scarboro Rd, Oak Ridge, Tennessee, 37830, USA, 37831, USA

<sup>§§</sup> Department of Nuclear Engineering, University of Tennessee, 301 Middle Dr., Pasqua Nuclear Engineering Bldg., Knoxville, Tennessee, 37996, USA

<sup>†††</sup>Radiochemistry Center of Excellence (RCOE), University of Tennessee, 1508 Middle Dr., Ferris Hall, Knoxville, Tennessee 37996, USA

<sup>†††</sup>Department of Chemistry, University of Tennessee, 1420 Circle Drive, Knoxville, Tennessee, 37996, USA

<sup>§§§</sup>Institute for Advanced Computational Science, Stony Brook University, 100 Nicolls Road, Stony Brook, New York 11790 USA,

<sup>††††</sup>Computational Sciences Center, Brookhaven National Laboratory, Bldg. 463B, Upton, New York, 11973, USA

Table S.1 shows the magnitude of complex frequencies from vibrational frequency calculations for all compounds.

Table S.2 shows the contribution from zero-point energy (ZPE) corrections to the Gibbs free energy ( $\Delta G$ ) of reaction.

Table S.3 shows the contribution from the entropy (S) onto the Gibbs free energy ( $\Delta G$ ) of reaction.

Table S.4 shows the partial charges calculated with NBO for  $AnO_2^{2+}$ , backbone,  $HX^-$ ,  $NO_3^-$ , and  $CH_3OH$  fragments in  $AnO_2(HX)(NO_3)(CH_3OH)$ , and  $AnO_2(HX)_2$ , with An = U, Np, Pu, and Am, and HX = HA, HB, and HC.

Table S.5 shows the bond length differences between calculated and experimental values for U-O1, U-O3, U-O4, U-N2, and N3-O4 (Å).

Table S.6 shows interatomic distance in backbone in  $H_2X$ ,  $AnO_2(HX)(NO_3)(CH_3OH)$ , and  $AnO_2(HX)_2$ .

Table S.7 shows the calculated normalized  $\Delta(\Delta G)_{rxn}$  for  $AnO_2(HX)(NO_3)(CH_3OH)$ , and  $AnO_2(HX)_2$ , with An = U, Np, Pu, Am, and HX = HA, HB, and HC.

Additionally, structural characteristics, population analysis, and relative Gibbs free energies of reaction for uranyl compounds are studied with the recently developed Strongly Constrained and Appropriately Normed Semilocal (SCAN) density functional revealing that U-O distances are between 0.01 and 0.05 Å from those in structures optimized with the B3LYP functional. Differences in partial charges between the uranyl fragment and the backbone of the ligands are less than 0.2 units lower when calculated with SCAN than with B3LYP. Relative Gibbs free energies of reaction calculated with SCAN are between 2 and 28 kcal mol<sup>-1</sup> from those calculated with the B3LYP functional.

Table S.8 shows the difference in predicted U-X (with X = O1, O2, O3, O4, N2, OI, OII, and OIII) distances, and O3-U-O4 angle in UO<sub>2</sub>(HX)(NO<sub>3</sub>)(CH<sub>3</sub>OH) and UO<sub>2</sub>(HX)<sub>2</sub> (with HX = HA, HB, and HC) optimized with the SCAN and B3LYP functionals.

Table S.9 shows difference in calculated partial charge between the uranyl fragment and backbone in UO<sub>2</sub>(HX)(NO<sub>3</sub>)(CH<sub>3</sub>OH) and UO<sub>2</sub>(HX)<sub>2</sub> (with HX = HA, HB, and HC) structures optimized with the SCAN and B3LYP functionals.

Table S.10 shows the calculated  $\Delta(\Delta G)_{\text{rxn}}$  with the B3LYP and SCAN functionals (according to Eq. 1, and 2) for UO<sub>2</sub>(HX)(NO<sub>3</sub>)(CH<sub>3</sub>OH), and UO<sub>2</sub>(HX)<sub>2</sub> (with HX = HA, HB, and HC) with respect to UO<sub>2</sub>(HB)(NO<sub>3</sub>)(CH<sub>3</sub>OH) (as shown in Eq. 3.a and 3.b), and shown in kcal mol<sup>-1</sup>.

Table S.1-a: Magnitude of complex frequencies from vibrational frequency calculations for all compounds.

| Compound                                                    | U         | Np        | Pu        | Am |
|-------------------------------------------------------------|-----------|-----------|-----------|----|
| AnO <sub>2</sub> (HA)(NO <sub>3</sub> )(CH <sub>3</sub> OH) | 11        | 29        | 15        | -  |
| AnO <sub>2</sub> (HB)(NO <sub>3</sub> )(CH <sub>3</sub> OH) | 18        | 30        | -         | -  |
| AnO <sub>2</sub> (HC)(NO <sub>3</sub> )(CH <sub>3</sub> OH) | -         | 17        | 24        | -  |
| AnO <sub>2</sub> (HA) <sub>2</sub>                          | 73 and 23 | 53 and 16 | 41 and 31 | 40 |
| AnO <sub>2</sub> (HB) <sub>2</sub>                          | 69 and 20 | 77 and 52 | 36 and 24 | -  |
| AnO <sub>2</sub> (HC) <sub>2</sub>                          | 69        | 71 and 9  | 22        | -  |

Table S.1-b: Magnitude of complex frequencies from vibrational frequency calculations for uranyl compounds calculated with the SCAN and B3LYP functionals. [Note that these optimizations are performed with NWChem 6.8 whereas other B3LYP predicted properties in this study are calculated with NWChem 6.5 and 6.6].

| Functional | Compound                                                   | Magnitude               |
|------------|------------------------------------------------------------|-------------------------|
| B3LYP      | UO <sub>2</sub> (HA)(NO <sub>3</sub> )(CH <sub>3</sub> OH) | 10.62                   |
|            | UO <sub>2</sub> (HB)(NO <sub>3</sub> )(CH <sub>3</sub> OH) | 19.56                   |
|            | UO <sub>2</sub> (HC)(NO <sub>3</sub> )(CH <sub>3</sub> OH) | -                       |
|            | UO <sub>2</sub> (HA) <sub>2</sub>                          | 79.33 and 28.26         |
|            | UO <sub>2</sub> (HB) <sub>2</sub>                          | 73.01 and 11.44         |
|            | UO <sub>2</sub> (HC) <sub>2</sub>                          | 68.60                   |
| SCAN       | UO <sub>2</sub> (HA)(NO <sub>3</sub> )(CH <sub>3</sub> OH) | 69.16 and 52.73         |
|            | UO <sub>2</sub> (HB)(NO <sub>3</sub> )(CH <sub>3</sub> OH) | 98.65 and 58.12         |
|            | UO <sub>2</sub> (HC)(NO <sub>3</sub> )(CH <sub>3</sub> OH) | 18.94                   |
|            | UO <sub>2</sub> (HA) <sub>2</sub>                          | 18.87 and 7.04          |
|            | UO <sub>2</sub> (HB) <sub>2</sub>                          | 67.37, 38.25, and 25.30 |
|            | UO <sub>2</sub> (HC) <sub>2</sub>                          | 27.19                   |

Table S.2: Contribution from zero-point energy (ZPE) correction onto the Gibbs free energy ( $\Delta G$ ) of the compound. [Calculated as  $ZPE/\Delta G \times 100$ ].

| Compound                                                    | U     | Np    | Pu    | Am    |
|-------------------------------------------------------------|-------|-------|-------|-------|
| AnO <sub>2</sub> (HA)(NO <sub>3</sub> )(CH <sub>3</sub> OH) | 0.01% | 0.01% | 0.01% | 0.01% |
| AnO <sub>2</sub> (HB)(NO <sub>3</sub> )(CH <sub>3</sub> OH) | 0.01% | 0.01% | 0.01% | 0.01% |
| AnO <sub>2</sub> (HC)(NO <sub>3</sub> )(CH <sub>3</sub> OH) | 0.01% | 0.01% | 0.01% | 0.01% |
| AnO <sub>2</sub> (HA) <sub>2</sub>                          | 0.02% | 0.02% | 0.02% | 0.02% |
| AnO <sub>2</sub> (HB) <sub>2</sub>                          | 0.02% | 0.01% | 0.01% | 0.01% |
| AnO <sub>2</sub> (HC) <sub>2</sub>                          | 0.02% | 0.02% | 0.02% | 0.02% |

Table S.3: Contribution from the entropy (S) onto the Gibbs free energy ( $\Delta G$ ) of the compound. [Calculated as  $S/\Delta G \times 100$ ].

| Compound                                                    | U        | Np       | Pu       | Am       |
|-------------------------------------------------------------|----------|----------|----------|----------|
| AnO <sub>2</sub> (HA)(NO <sub>3</sub> )(CH <sub>3</sub> OH) | 0.00001% | 0.00001% | 0.00001% | 0.00001% |
| AnO <sub>2</sub> (HB)(NO <sub>3</sub> )(CH <sub>3</sub> OH) | 0.00001% | 0.00001% | 0.00001% | 0.00001% |
| AnO <sub>2</sub> (HC)(NO <sub>3</sub> )(CH <sub>3</sub> OH) | 0.00002% | 0.00001% | 0.00001% | 0.00001% |
| AnO <sub>2</sub> (HA) <sub>2</sub>                          | 0.00001% | 0.00001% | 0.00001% | 0.00001% |
| AnO <sub>2</sub> (HB) <sub>2</sub>                          | 0.00001% | 0.00001% | 0.00001% | 0.00001% |
| AnO <sub>2</sub> (HC) <sub>2</sub>                          | 0.00001% | 0.00001% | 0.00001% | 0.00001% |

Table S.4: Partial charges calculated with NBO for AnO<sub>2</sub><sup>2+</sup>, backbone, HX<sup>-</sup>, NO<sub>3</sub><sup>-</sup>, and CH<sub>3</sub>OH fragments in AnO<sub>2</sub>(HX)(NO<sub>3</sub>)(CH<sub>3</sub>OH), and AnO<sub>2</sub>(HX)<sub>2</sub>, with An = U, Np, Pu, and Am, and HX = HA, HB, and HC.

| Fragment                           | An | AnO <sub>2</sub> (HA)(NO <sub>3</sub> )(CH <sub>3</sub> OH) | AnO <sub>2</sub> (HB)(NO <sub>3</sub> )(CH <sub>3</sub> OH) | AnO <sub>2</sub> (HC)(NO <sub>3</sub> )(CH <sub>3</sub> OH) | AnO <sub>2</sub> (HA) <sub>2</sub> | AnO <sub>2</sub> (HB) <sub>2</sub> | AnO <sub>2</sub> (HC) <sub>2</sub> |
|------------------------------------|----|-------------------------------------------------------------|-------------------------------------------------------------|-------------------------------------------------------------|------------------------------------|------------------------------------|------------------------------------|
| AnO <sub>2</sub> <sup>2+</sup>     | U  | 0.75                                                        | 0.78                                                        | 0.74                                                        | 0.72                               | 0.78                               | 0.71                               |
|                                    | Np | 0.70                                                        | 0.73                                                        | 0.70                                                        | 0.69                               | 0.74                               | 0.66                               |
|                                    | Pu | 0.67                                                        | 0.70                                                        | 0.67                                                        | 0.63                               | 0.70                               | 0.61                               |
|                                    | Am | 0.73                                                        | 0.75                                                        | 0.72                                                        | 0.71                               | 0.75                               | 0.69                               |
| Backbone<br>(O3-N1-C1-N2-C2-N3-O4) | U  | -1.13                                                       | -1.15                                                       | -1.16                                                       | -1.09                              | -1.11                              | -1.14                              |
|                                    | Np | -1.09                                                       | -1.13                                                       | -1.14                                                       | -1.06                              | -1.08                              | -1.11                              |
|                                    | Pu | -1.07                                                       | -1.11                                                       | -1.12                                                       | -1.02                              | -1.07                              | -1.09                              |
|                                    | Am | -1.11                                                       | -1.13                                                       | -1.16                                                       | -1.05                              | -1.08                              | -1.12                              |
| HX <sup>-</sup>                    | U  | -0.33                                                       | -0.38                                                       | -0.32                                                       | -0.36                              | -0.39                              | -0.35                              |
|                                    | Np | -0.31                                                       | -0.36                                                       | -0.31                                                       | -0.34                              | -0.37                              | -0.33                              |
|                                    | Pu | -0.28                                                       | -0.34                                                       | -0.28                                                       | -0.31                              | -0.35                              | -0.31                              |
|                                    | Am | -0.33                                                       | -0.37                                                       | -0.33                                                       | -0.35                              | -0.37                              | -0.34                              |
| NO <sub>3</sub> <sup>-</sup>       | U  | -0.56                                                       | -0.55                                                       | -0.56                                                       | -                                  | -                                  | -                                  |
|                                    | Np | -0.53                                                       | -0.52                                                       | -0.54                                                       | -                                  | -                                  | -                                  |
|                                    | Pu | -0.54                                                       | -0.52                                                       | -0.53                                                       | -                                  | -                                  | -                                  |
|                                    | Am | -0.53                                                       | -0.52                                                       | -0.53                                                       | -                                  | -                                  | -                                  |
| CH <sub>3</sub> OH                 | U  | 0.14                                                        | 0.15                                                        | 0.14                                                        | -                                  | -                                  | -                                  |
|                                    | Np | 0.14                                                        | 0.15                                                        | 0.14                                                        | -                                  | -                                  | -                                  |
|                                    | Pu | 0.14                                                        | 0.16                                                        | 0.15                                                        | -                                  | -                                  | -                                  |
|                                    | Am | 0.14                                                        | 0.15                                                        | 0.14                                                        | -                                  | -                                  | -                                  |

Table S.5: Bond length differences between calculated and experimental values for U-O1, U-O3, U-O4, U-N2, and N3-O4 (Å). Bond lengths for  $\text{UO}_2(\text{HA})(\text{NO}_3)(\text{CH}_3\text{OH})$  are reported by Bernstein, et. al.<sup>1</sup> Bond lengths for  $\text{UO}_2(\text{HC})_2$  are reported by Tian, et. al.<sup>2]</sup>

|       | Compound                                                    | Experimental | Calculated | Difference |
|-------|-------------------------------------------------------------|--------------|------------|------------|
| U-O1  | $\text{UO}_2(\text{HA})(\text{NO}_3)(\text{CH}_3\text{OH})$ | 1.781        | 1.775      | -0.006     |
|       | $\text{UO}_2(\text{HC})_2$                                  | 1.785        | 1.781      | -0.004     |
| U-O3  | $\text{UO}_2(\text{HA})(\text{NO}_3)(\text{CH}_3\text{OH})$ | 2.398        | 2.435      | 0.037      |
|       | $\text{UO}_2(\text{HC})_2$                                  | 2.535        | 2.510      | -0.025     |
| U-O4  | $\text{UO}_2(\text{HA})(\text{NO}_3)(\text{CH}_3\text{OH})$ | 2.420        | 2.504      | 0.084      |
|       | $\text{UO}_2(\text{HC})_2$                                  | 2.430        | 2.510      | 0.080      |
| U-N2  | $\text{UO}_2(\text{HA})(\text{NO}_3)(\text{CH}_3\text{OH})$ | 2.514        | 2.616      | 0.102      |
|       | $\text{UO}_2(\text{HC})_2$                                  | 2.563        | 2.657      | 0.094      |
| N3-O4 | $\text{UO}_2(\text{HA})(\text{NO}_3)(\text{CH}_3\text{OH})$ | 1.371        | 1.332      | -0.039     |
|       | $\text{UO}_2(\text{HC})_2$                                  | 1.362        | 1.326      | -0.036     |

Table S.6: Interatomic distance in backbone in  $\text{H}_2\text{X}$ ,  $\text{AnO}_2(\text{HX})(\text{NO}_3)(\text{CH}_3\text{OH})$ , and  $\text{AnO}_2(\text{HX})_2$ , with An = U, Np, Pu, and Am, and X = A, B, C.

| Values | An | $\text{AnO}_2(\text{HA})(\text{NO}_3)(\text{CH}_3\text{OH})$ | $\text{AnO}_2(\text{HB})(\text{NO}_3)(\text{CH}_3\text{OH})$ | $\text{AnO}_2(\text{HC})(\text{NO}_3)(\text{CH}_3\text{OH})$ | $\text{AnO}_2(\text{HA})_2$ | $\text{AnO}_2(\text{HB})_2$ | $\text{AnO}_2(\text{HC})_2$ | H <sub>2</sub> A | H <sub>2</sub> B | H <sub>2</sub> C |
|--------|----|--------------------------------------------------------------|--------------------------------------------------------------|--------------------------------------------------------------|-----------------------------|-----------------------------|-----------------------------|------------------|------------------|------------------|
| O3-N1  | U  | 1.320                                                        | 1.322                                                        | 1.326                                                        | 1.319                       | 1.323                       | 1.326                       | 1.415            | 1.415            | 1.424            |
|        | Np | 1.318                                                        | 1.319                                                        | 1.324                                                        | 1.319                       | 1.325                       | 1.326                       |                  |                  |                  |
|        | Pu | 1.320                                                        | 1.319                                                        | 1.325                                                        | 1.319                       | 1.322                       | 1.326                       |                  |                  |                  |
|        | Am | 1.317                                                        | 1.319                                                        | 1.324                                                        | 1.318                       | 1.322                       | 1.324                       |                  |                  |                  |
| N1-C1  | U  | 1.318                                                        | 1.310                                                        | 1.309                                                        | 1.319                       | 1.312                       | 1.311                       | 1.291            | 1.282            | 1.284            |
|        | Np | 1.318                                                        | 1.310                                                        | 1.309                                                        | 1.320                       | 1.312                       | 1.311                       |                  |                  |                  |
|        | Pu | 1.319                                                        | 1.311                                                        | 1.310                                                        | 1.321                       | 1.312                       | 1.312                       |                  |                  |                  |
|        | Am | 1.318                                                        | 1.310                                                        | 1.309                                                        | 1.320                       | 1.312                       | 1.312                       |                  |                  |                  |
| C1-N2  | U  | 1.348                                                        | 1.351                                                        | 1.347                                                        | 1.343                       | 1.347                       | 1.341                       | 1.380            | 1.388            | 1.383            |
|        | Np | 1.349                                                        | 1.352                                                        | 1.348                                                        | 1.343                       | 1.347                       | 1.340                       |                  |                  |                  |
|        | Pu | 1.347                                                        | 1.352                                                        | 1.347                                                        | 1.341                       | 1.349                       | 1.340                       |                  |                  |                  |
|        | Am | 1.349                                                        | 1.352                                                        | 1.349                                                        | 1.343                       | 1.348                       | 1.341                       |                  |                  |                  |
| N2-C2  | U  | 1.340                                                        | 1.344                                                        | 1.338                                                        | 1.343                       | 1.347                       | 1.341                       | 1.380            | 1.388            | 1.383            |
|        | Np | 1.339                                                        | 1.344                                                        | 1.337                                                        | 1.343                       | 1.348                       | 1.340                       |                  |                  |                  |
|        | Pu | 1.340                                                        | 1.344                                                        | 1.337                                                        | 1.341                       | 1.349                       | 1.340                       |                  |                  |                  |
|        | Am | 1.340                                                        | 1.344                                                        | 1.338                                                        | 1.343                       | 1.348                       | 1.341                       |                  |                  |                  |
| C2-N3  | U  | 1.320                                                        | 1.312                                                        | 1.313                                                        | 1.319                       | 1.312                       | 1.311                       | 1.291            | 1.282            | 1.284            |
|        | Np | 1.320                                                        | 1.312                                                        | 1.313                                                        | 1.320                       | 1.312                       | 1.311                       |                  |                  |                  |
|        | Pu | 1.321                                                        | 1.313                                                        | 1.313                                                        | 1.321                       | 1.312                       | 1.312                       |                  |                  |                  |
|        | Am | 1.320                                                        | 1.313                                                        | 1.313                                                        | 1.320                       | 1.312                       | 1.312                       |                  |                  |                  |
| N3-O4  | U  | 1.332                                                        | 1.334                                                        | 1.336                                                        | 1.319                       | 1.323                       | 1.326                       | 1.415            | 1.415            | 1.424            |
|        | Np | 1.334                                                        | 1.335                                                        | 1.337                                                        | 1.319                       | 1.321                       | 1.326                       |                  |                  |                  |
|        | Pu | 1.331                                                        | 1.334                                                        | 1.337                                                        | 1.319                       | 1.322                       | 1.326                       |                  |                  |                  |
|        | Am | 1.332                                                        | 1.334                                                        | 1.335                                                        | 1.318                       | 1.322                       | 1.324                       |                  |                  |                  |

Table S.7: Calculated  $\Delta(\Delta G)_{rxn}$  according to Eq. 1, and 2 for  $AnO_2(HX)(NO_3)(CH_3OH)$ , and  $AnO_2(HX)_2$ , with An = U, Np, Pu, Am, and HX = HA, HB, and HC. Results are normalized to  $AmO_2(HB)(NO_3)(CH_3OH)$ , and shown in kcal mol<sup>-1</sup>.

| <b>Compound</b>           | <b><math>\Delta(\Delta G)_{rxn}</math> normalized to <math>AmO_2(HB)(NO_3)(CH_3OH)</math></b> |
|---------------------------|-----------------------------------------------------------------------------------------------|
| $UO_2(HA)(NO_3)(CH_3OH)$  | -19.591                                                                                       |
| $NpO_2(HA)(NO_3)(CH_3OH)$ | -19.376                                                                                       |
| $PuO_2(HA)(NO_3)(CH_3OH)$ | -26.248                                                                                       |
| $AmO_2(HA)(NO_3)(CH_3OH)$ | -10.290                                                                                       |
| $UO_2(HB)(NO_3)(CH_3OH)$  | -8.728                                                                                        |
| $NpO_2(HB)(NO_3)(CH_3OH)$ | -8.495                                                                                        |
| $PuO_2(HB)(NO_3)(CH_3OH)$ | -16.797                                                                                       |
| $AmO_2(HB)(NO_3)(CH_3OH)$ | -                                                                                             |
| $UO_2(HC)(NO_3)(CH_3OH)$  | -28.840                                                                                       |
| $NpO_2(HC)(NO_3)(CH_3OH)$ | -27.415                                                                                       |
| $PuO_2(HC)(NO_3)(CH_3OH)$ | -34.568                                                                                       |
| $AmO_2(HC)(NO_3)(CH_3OH)$ | -18.753                                                                                       |
| $UO_2(HA)_2$              | -42.638                                                                                       |
| $NpO_2(HA)_2$             | -40.559                                                                                       |
| $PuO_2(HA)_2$             | -48.479                                                                                       |
| $AmO_2(HA)_2$             | -31.132                                                                                       |
| $UO_2(HB)_2$              | -22.666                                                                                       |
| $NpO_2(HB)_2$             | -21.428                                                                                       |
| $PuO_2(HB)_2$             | -28.351                                                                                       |
| $AmO_2(HB)_2$             | -13.904                                                                                       |
| $UO_2(HC)_2$              | -59.013                                                                                       |
| $NpO_2(HC)_2$             | -56.609                                                                                       |
| $PuO_2(HC)_2$             | -63.616                                                                                       |
| $AmO_2(HC)_2$             | -46.196                                                                                       |

## Differences in predicted characteristics in structures optimized with the SCAN and B3LYP functionals

The  $\text{UO}_2(\text{HX})(\text{NO}_3)(\text{CH}_3\text{OH})$  and  $\text{UO}_2(\text{HX})_2$  (with  $\text{HX} = \text{HA}, \text{HB},$  and  $\text{HC}$ ) structures optimized with the SCAN and B3LYP functionals show predicted U-O distances to be slightly longer with SCAN with differences of less than 0.0122 Å in the uranyl fragment (O1 and O2), and less than 0.0488 Å with equatorial oxygen atoms (O3 and O4). The U-N2 distance is predicted to be between 0.0363 and 0.0421 Å shorter in the structures optimized with SCAN than with B3LYP. The O3-U-O4 angle is predicted to be between 0.70 and 1.10° wider in structures optimized with SCAN than with those optimized with B3LYP. Differences in U-O1, U-O2, U-O3, U-O4, U-N2, U-OI, U-OII, U-OIII distances, and O3-U-O4 angles for structures optimized with SCAN and B3LYP are included in Table 7. The magnitudes of complex vibrational frequency modes in the SCAN/B3LYP comparison are reported in Table S.1 in the SI.

The difference between partial charges from the uranyl fragment and the backbone is predicted to be approximately 0.2 larger in structures optimized with the B3LYP functional than in those optimized with the SCAN functional, as shown in Table 8.

The associated Gibbs free energies of reaction to the structures optimized with the SCAN and B3LYP functional relative to  $\text{UO}_2(\text{HB})(\text{NO}_3)(\text{CH}_3\text{OH})$  show a  $|\Delta(\Delta G)_{\text{rxn}}|$  between 2 and 28 kcal mol<sup>-1</sup> between relative Gibbs free energies of reaction calculated with the SCAN and B3LYP functionals, as shown in Table 9. However, the relative Gibbs free energies of reaction predict  $\text{UO}_2(\text{HB})(\text{NO}_3)(\text{CH}_3\text{OH})$  to be slightly more stable than  $\text{UO}_2(\text{HA})(\text{NO}_3)(\text{CH}_3\text{OH})$  when calculated with the SCAN functional (3.46 kcal mol<sup>-1</sup> lower), but not with B3LYP (10.65 kcal mol<sup>-1</sup> higher).  $\text{UO}_2(\text{HC})(\text{OH})_2$  is predicted to be more stable than  $\text{UO}_2(\text{HB})(\text{NO}_3)(\text{CH}_3\text{OH})$  when calculated with both B3LYP and SCAN with a lower  $\Delta G_{\text{rxn}}$  of 20.59 and 18.29 kcal mol<sup>-1</sup>, respectively.  $\text{UO}_2(\text{HA})_2$ ,  $\text{UO}_2(\text{HB})_2$ , and  $\text{UO}_2(\text{HC})_2$  is predicted to be more stable than  $\text{UO}_2(\text{HB})(\text{NO}_3)(\text{CH}_3\text{OH})$  [ $\text{UO}_2(\text{HA})_2$  by 33.09 kcal mol<sup>-1</sup> when calculated with B3LYP and 5.32 kcal mol<sup>-1</sup> with SCAN;  $\text{UO}_2(\text{HB})_2$  by 13.52 kcal mol<sup>-1</sup> with B3LYP and 1.62 kcal mol<sup>-1</sup> with SCAN; and  $\text{UO}_2(\text{HC})_2$  by 50.90 kcal mol<sup>-1</sup> with B3LYP and 37.44 kcal mol<sup>-1</sup> with SCAN].

In conclusion, stability trends predicted with structures optimized with B3LYP and SCAN show variations in relative energies [with respect to  $\text{UO}_2(\text{HB})(\text{NO}_3)(\text{CH}_3\text{OH})$ ] between -11 kcal mol<sup>-1</sup> and -51 kcal mol<sup>-1</sup> with B3LYP, and between 3 and 37 kcal mol<sup>-1</sup> with SCAN. This difference in predicted Gibbs free energies of reaction when altering the functional of choice is consistent with predictions in an actinide nitrate study which tested the dependence of predicted thermochemical properties on the level of theory of choice.<sup>36</sup>

Table S.8: Difference in predicted U-X (with X = O1, O2, O3, O4, N2, OI, OII, and OIII) distances, and O3-U-O4 angle in  $\text{UO}_2(\text{HX})(\text{NO}_3)(\text{CH}_3\text{OH})$  and  $\text{UO}_2(\text{HX})_2$  (with  $\text{HX} = \text{HA}, \text{HB},$  and  $\text{HC}$ ) optimized with the SCAN and B3LYP functionals (reported in Å and degrees (°), for interatomic distances and angles, respectively).

|                                                             | U-O1    | U-O2    | U-O3   | U-O4   | U-N2   | U-OI   | U-OII  | U-OIII | O3-U-O4 |
|-------------------------------------------------------------|---------|---------|--------|--------|--------|--------|--------|--------|---------|
| $\text{UO}_2(\text{HA})(\text{NO}_3)(\text{CH}_3\text{OH})$ | -0.0113 | -0.0102 | 0.0288 | 0.0326 | 0.0396 | 0.0438 | 0.0399 | 0.0501 | -0.9    |
| $\text{UO}_2(\text{HB})(\text{NO}_3)(\text{CH}_3\text{OH})$ | -0.0114 | -0.0103 | 0.0343 | 0.0488 | 0.0371 | 0.0441 | 0.0371 | 0.0483 | -1.1    |
| $\text{UO}_2(\text{HC})(\text{NO}_3)(\text{CH}_3\text{OH})$ | -0.0122 | -0.0112 | 0.0315 | 0.0334 | 0.0391 | 0.0430 | 0.0384 | 0.0485 | -0.9    |
| $\text{UO}_2(\text{HA})_2$                                  | -0.0107 | -0.0107 | 0.0335 | 0.0335 | 0.0421 | -      | -      | -      | -0.7    |
| $\text{UO}_2(\text{HB})_2$                                  | -0.0103 | -0.0103 | 0.0452 | 0.0448 | 0.0363 | -      | -      | -      | -1.0    |
| $\text{UO}_2(\text{HC})_2$                                  | -0.0108 | -0.0108 | 0.0351 | 0.0351 | 0.0403 | -      | -      | -      | -0.7    |

Table S.9: Difference in calculated partial charge between the uranyl fragment and backbone in  $\text{UO}_2(\text{HX})(\text{NO}_3)(\text{CH}_3\text{OH})$  and  $\text{UO}_2(\text{HX})_2$  (with  $\text{HX} = \text{HA}, \text{HB},$  and  $\text{HC}$ ) structures optimized with the SCAN and B3LYP functionals.

| Compound                                                    | B3LYP | SCAN |
|-------------------------------------------------------------|-------|------|
| $\text{UO}_2(\text{HA})(\text{NO}_3)(\text{CH}_3\text{OH})$ | 1.12  | 0.87 |
| $\text{UO}_2(\text{HB})(\text{NO}_3)(\text{CH}_3\text{OH})$ | 1.16  | 0.91 |
| $\text{UO}_2(\text{HC})(\text{NO}_3)(\text{CH}_3\text{OH})$ | 1.15  | 0.91 |
| $\text{UO}_2(\text{HA})_2$                                  | 1.06  | 0.83 |
| $\text{UO}_2(\text{HB})_2$                                  | 1.14  | 0.90 |
| $\text{UO}_2(\text{HC})_2$                                  | 1.11  | 0.89 |

Table S.10: Calculated  $\Delta(\Delta G)_{\text{rxn}}$  with the B3LYP and SCAN functionals (according to Eq. 1, and 2) for  $\text{UO}_2(\text{HX})(\text{NO}_3)(\text{CH}_3\text{OH})$ , and  $\text{UO}_2(\text{HX})_2$  (with  $\text{HX} = \text{HA}, \text{HB},$  and  $\text{HC}$ ) with respect to  $\text{UO}_2(\text{HB})(\text{NO}_3)(\text{CH}_3\text{OH})$  (as shown in Eq. 3.a and 3.b), and shown in  $\text{kcal mol}^{-1}$ .

| Compound                                                    | B3LYP  | SCAN   |
|-------------------------------------------------------------|--------|--------|
| $\text{UO}_2(\text{HA})(\text{NO}_3)(\text{CH}_3\text{OH})$ | -10.65 | 3.46   |
| $\text{UO}_2(\text{HC})(\text{NO}_3)(\text{CH}_3\text{OH})$ | -20.59 | -18.29 |
| $\text{UO}_2(\text{HA})_2$                                  | -33.09 | -5.32  |
| $\text{UO}_2(\text{HB})_2$                                  | -13.52 | -1.62  |
| $\text{UO}_2(\text{HC})_2$                                  | -50.90 | -37.44 |

Stability trends predicted with structures optimized with B3LYP and SCAN show variations in relative energies [with respect to  $\text{UO}_2(\text{HB})(\text{NO}_3)(\text{CH}_3\text{OH})$ ] between  $-11 \text{ kcal mol}^{-1}$  and  $-51 \text{ kcal mol}^{-1}$  with B3LYP, and between 3 and 37  $\text{kcal mol}^{-1}$  with SCAN.

## References

- (1) Bernstein, K. J.; Do-Thanh, C.-L.; Penchoff, D. A.; Alan Cramer, S.; Murdock, C. R.; Lu, Z.; Harrison, R. J.; Camden, J. P.; Jenkins, D. M. The Synthesis and Spectroscopic Characterization of an Aromatic Uranium Amidoxime Complex. *Inorganica Chim. Acta* **2014**, *421*, 374–379.
- (2) Tian, G.; Teat, S. J.; Zhang, Z.; Rao, L. Sequestering Uranium from Seawater: Binding Strength and Modes of Uranyl Complexes with Glutarimidedioxime. *Dalton Trans.* **2012**, *41* (38), 11579–11586.
